# Supplementary material for: Molecular and Antigenic Characterization of Avian H9N2 Viruses in Southern China
Source: PubMed Central journal article supplement (PMC8754122; doi:10.1128/spectrum.00822-21), 2022-01-12
Supplement: spectrum00822-21_supp_1_seq11.pdf [file spectrum00822-21_supp_1_seq11.pdf]

# Subgroup III

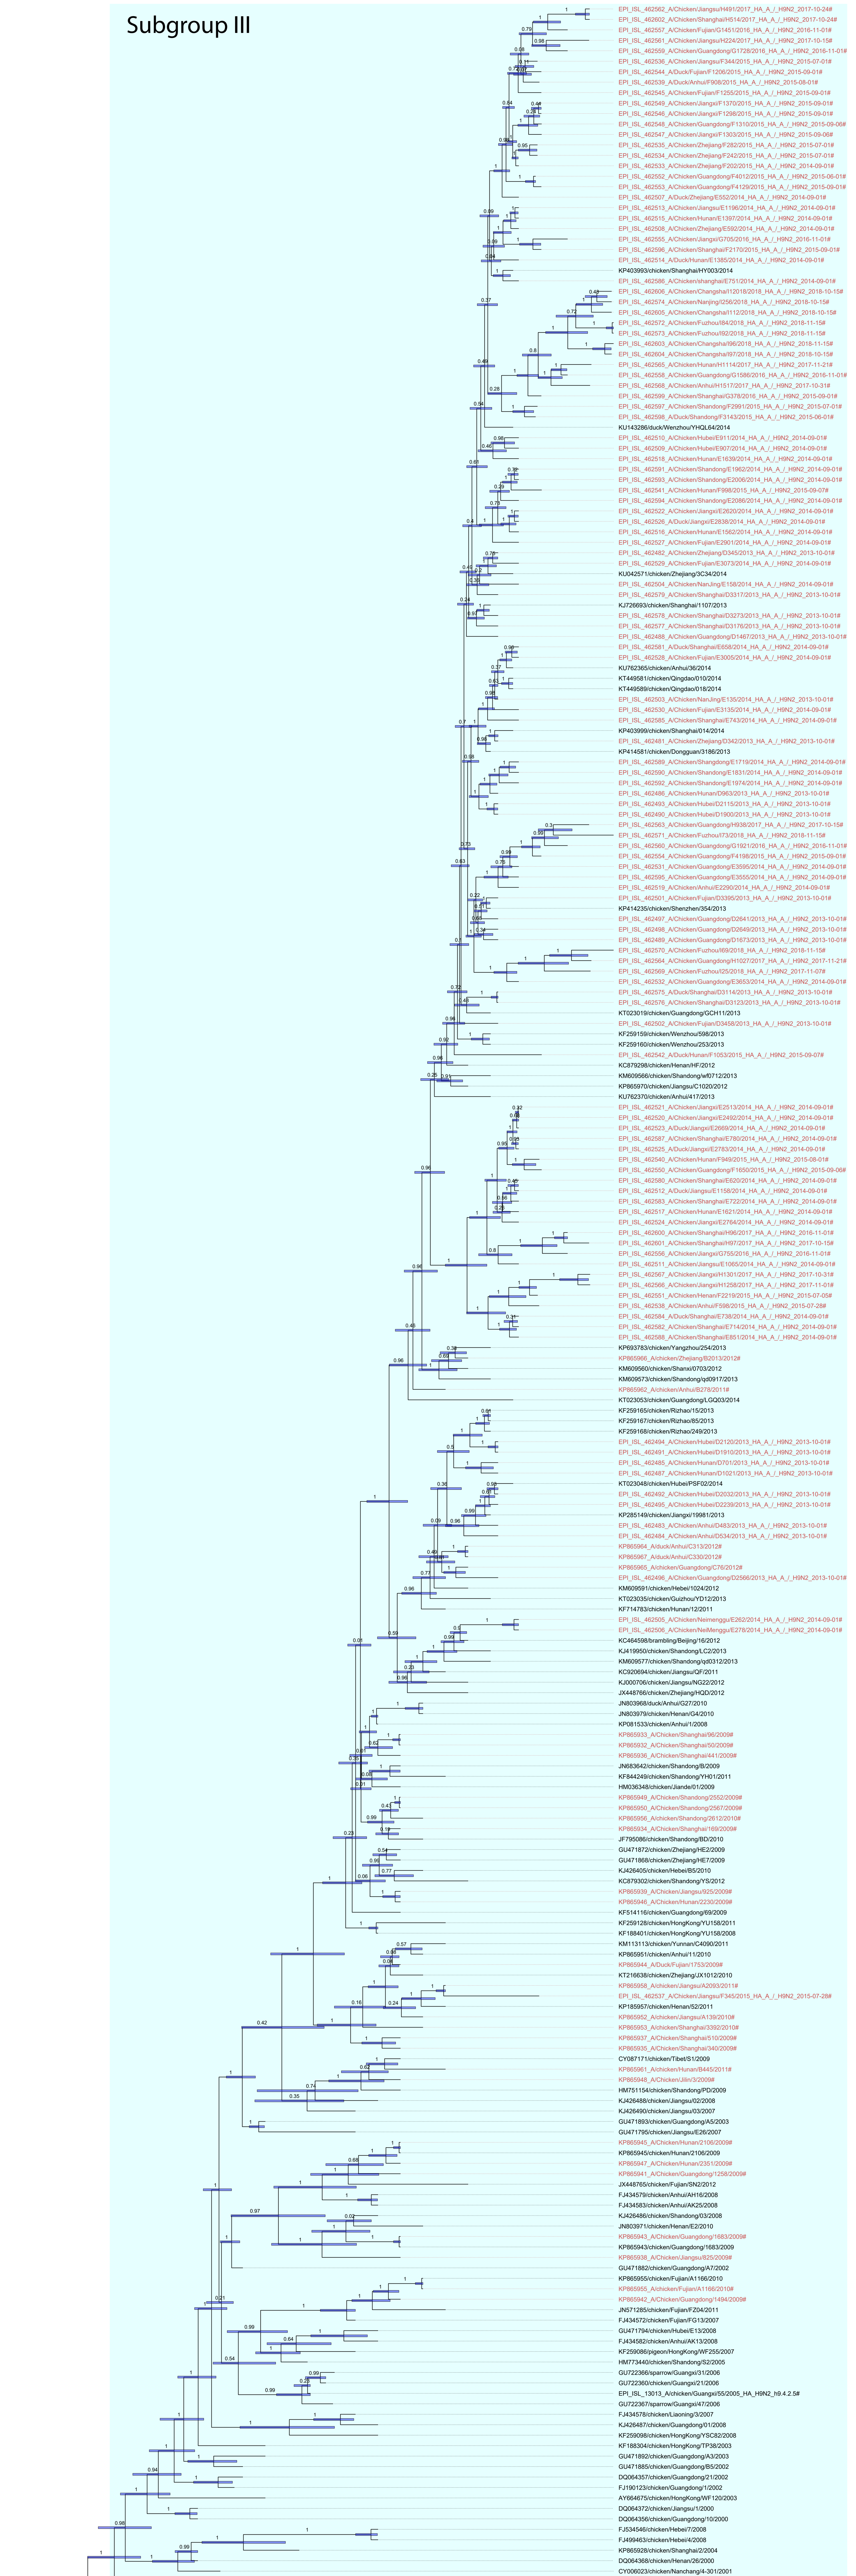

# Subgroup II

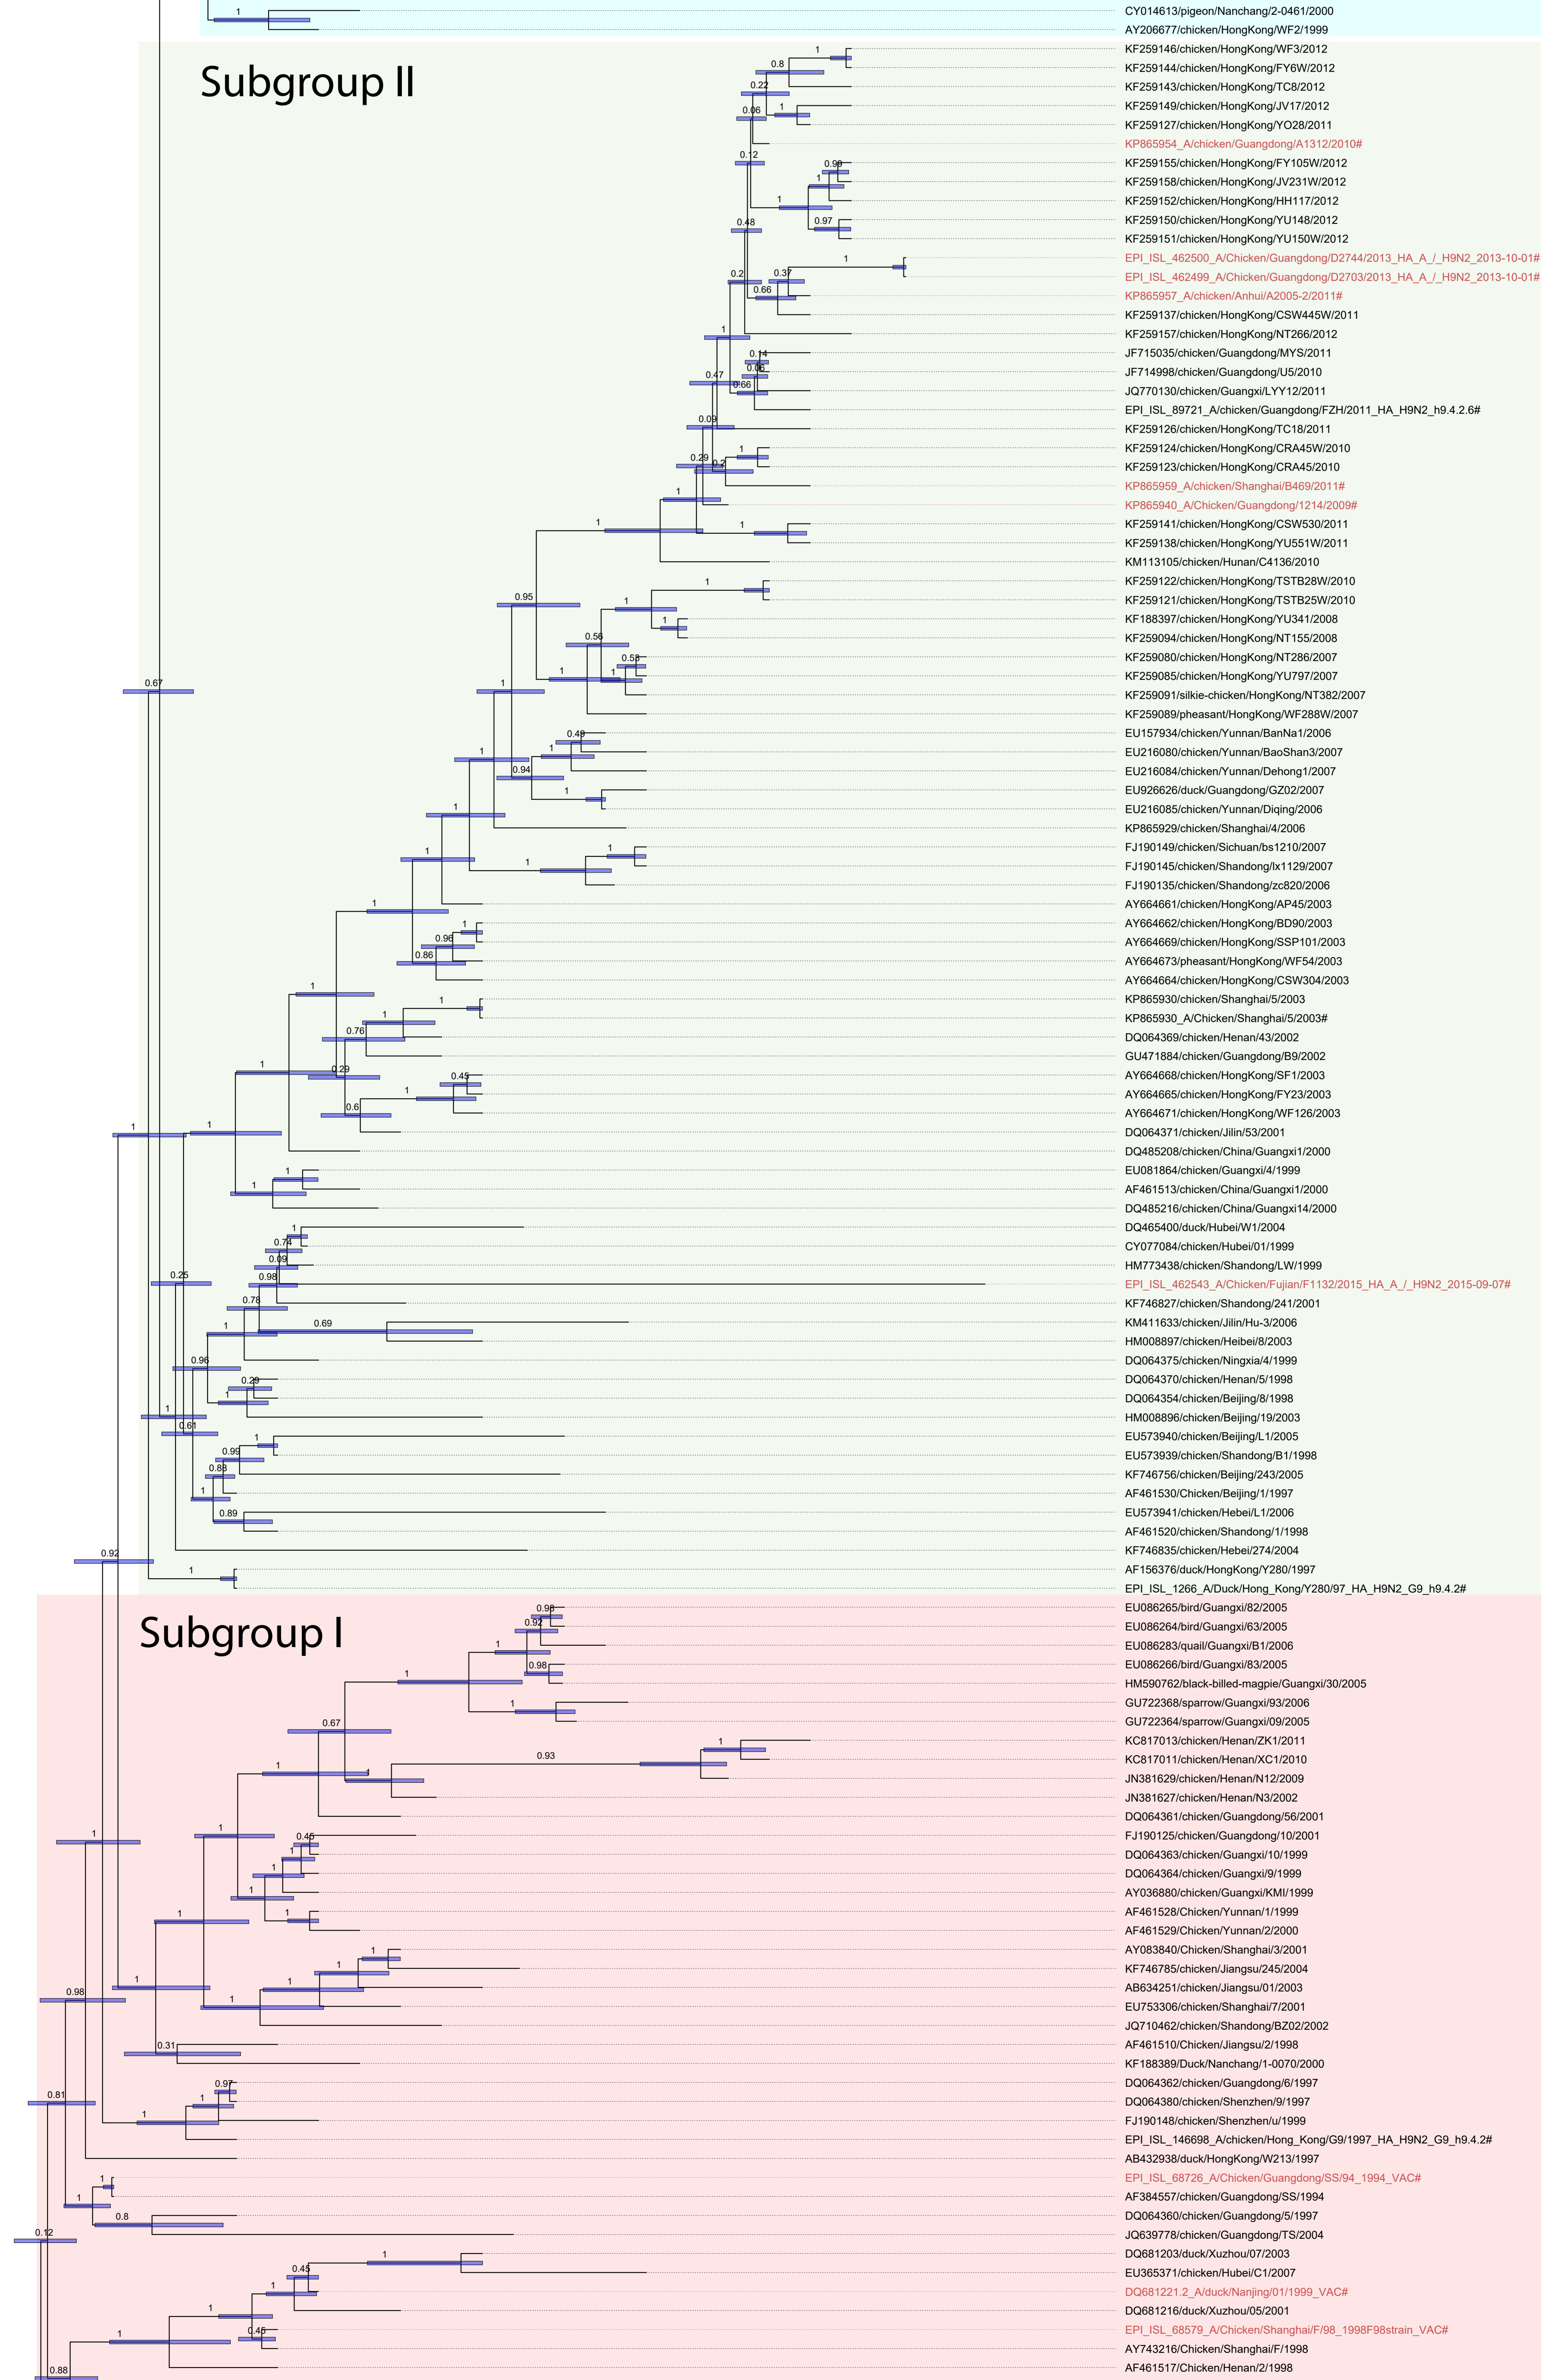

# Subgroup I

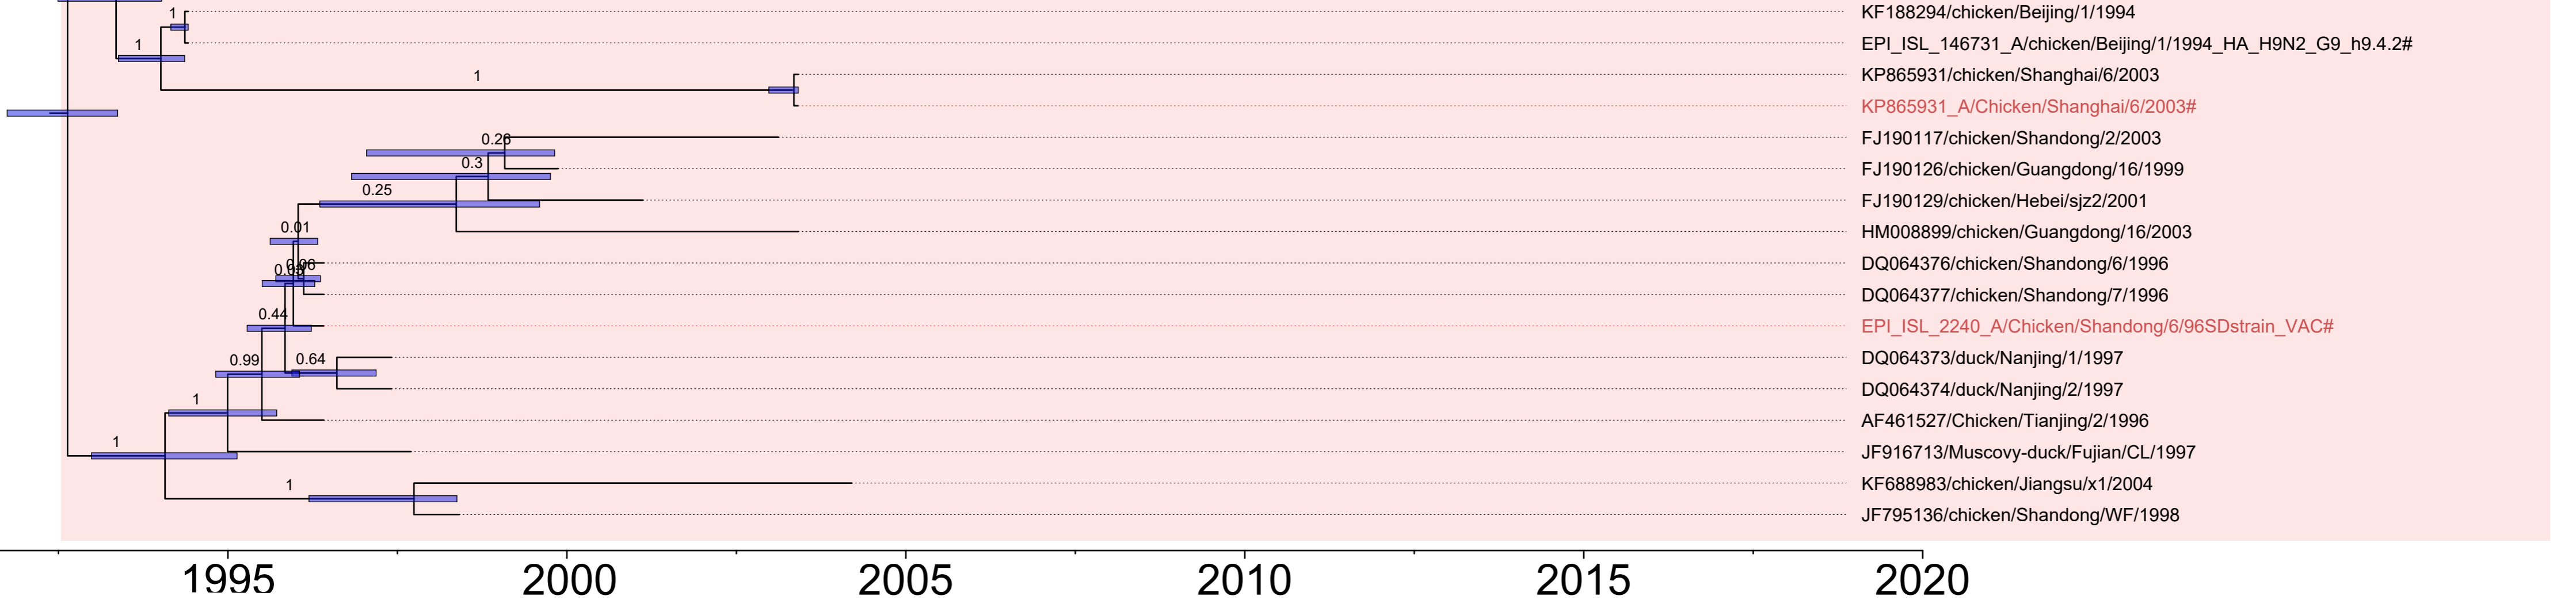

**Supplementary File1. Time-scale tree of HA gene of the G9 lineage of H9N2.** The lab-isolated H9N2 strains from the 2013 to 2018 surveillance are marked with “EPI\_ISL\_”. The G9 lineage strains recovered from the data set of Yang et al 2019 (1) are given in black.

**Reference**

1. Yang J, Müller NF, Bouckaert R, Xu B, Drummond AJ. 2019. Bayesian phylodynamics of avian influenza A virus H9N2 in Asia with time-dependent predictors of migration. *PLoS computational biology* 15:e1007189.

Table S1. The submission of sequence date in GIASID and GeneBank.

| Isolate_Name                   | Country | Province  | Host    | Collection_Date | Segment_Ids<br>GISAID | Segment_Ids<br>GeneBank |
|--------------------------------|---------|-----------|---------|-----------------|-----------------------|-------------------------|
| A/Chicken/Zhejiang/D342/2013   | China   | Zhejiang  | Chicken | 2013-10         | EPI1742690            | OK563213                |
| A/Chicken/Zhejiang/D345/2013   | China   | Zhejiang  | Chicken | 2013-10         | EPI1742698            | OK563212                |
| A/Chicken/Anhui/D483/2013      | China   | Anhui     | Chicken | 2013-10         | EPI1742706            | OK563214                |
| A/Chicken/Anhui/D534/2013      | China   | Anhui     | Chicken | 2013-10         | EPI1742714            | OK563215                |
| A/Chicken/Hunan/D701/2013      | China   | Hunan     | Chicken | 2013-10         | EPI1742722            | OK563216                |
| A/Chicken/Hunan/D963/2013      | China   | Hunan     | Chicken | 2013-10         | EPI1742730            | OK563217                |
| A/Chicken/Hunan/D1021/2013     | China   | Hunan     | Chicken | 2013-10         | EPI1742738            | OK563208                |
| A/Chicken/Guangdong/D1467/2013 | China   | Guangdong | Chicken | 2013-10         | EPI1742746            | OK563218                |
| A/Chicken/Guangdong/D1673/2013 | China   | Guangdong | Chicken | 2013-10         | EPI1742754            | OK563219                |
| A/Chicken/Guangdong/D2566/2013 | China   | Guangdong | Chicken | 2013-10         | EPI1742810            | OK563220                |
| A/Chicken/Guangdong/D2641/2013 | China   | Guangdong | Chicken | 2013-10         | EPI1742818            | OK563209                |
| A/Chicken/Guangdong/D2649/2013 | China   | Guangdong | Chicken | 2013-10         | EPI1742826            | OK563221                |
| A/Chicken/Guangdong/D2703/2013 | China   | Guangdong | Chicken | 2013-10         | EPI1742834            | OK563210                |
| A/Chicken/Guangdong/D2744/2013 | China   | Guangdong | Chicken | 2013-10         | EPI1742842            | OK563222                |
| A/Duck/Shanghai/D3114/2013     | China   | Shanghai  | Duck    | 2013-10         | EPI1743402            | OK563223                |
| A/Chicken/Shanghai/D3123/2013  | China   | Shanghai  | Chicken | 2013-10         | EPI1743410            | OK563224                |
| A/Chicken/Shanghai/D3176/2013  | China   | Shanghai  | Chicken | 2013-10         | EPI1743418            | OK563225                |
| A/Chicken/Shanghai/D3273/2013  | China   | Shanghai  | Chicken | 2013-10         | EPI1743426            | OK563211                |
| A/Chicken/Shanghai/D3317/2013  | China   | Shanghai  | Chicken | 2013-10         | EPI1743434            | OK563232                |
| A/Chicken/Fujian/D3395/2013    | China   | Fujian    | Chicken | 2013-10         | EPI1742850            | OK563226                |
| A/Chicken/Fujian/D3458/2013    | China   | Fujian    | Chicken | 2013-10         | EPI1742858            | OK563227                |
| A/Chicken/NanJing/E135/2014    | China   | Jiangsu   | Chicken | 2014-9          | EPI1742866            | OK563173                |
| A/Chicken/NanJing/E158/2014    | China   | Jiangsu   | Chicken | 2014-9          | EPI1742874            | OK563174                |
| A/Duck/Zhejiang/E552/2014      | China   | Zhejiang  | Duck    | 2014-9          | EPI1742898            | OK563169                |
| A/Chicken/Zhejiang/E592/2014   | China   | Zhejiang  | Chicken | 2014-9          | EPI1742906            | OK563175                |
| A/Chicken/Shanghai/E620/2014   | China   | Shanghai  | Chicken | 2014-9          | EPI1743442            | OK563176                |
| A/Duck/Shanghai/E658/2014      | China   | Shanghai  | Duck    | 2014-9          | EPI1743450            | OK563171                |
| A/Chicken/Shanghai/E714/2014   | China   | Shanghai  | Chicken | 2014-9          | EPI1743458            | OK563177                |
| A/Chicken/Shanghai/E722/2014   | China   | Shanghai  | Chicken | 2014-9          | EPI1743466            | OK563178                |
| A/Duck/Shanghai/E738/2014      | China   | Shanghai  | Duck    | 2014-9          | EPI1743474            | OK563179                |
| A/Chicken/Shanghai/E743/2014   | China   | Shanghai  | Chicken | 2014-9          | EPI1743482            | OK563180                |
| A/Chicken/shanghai/E751/2014   | China   | Shanghai  | Chicken | 2014-9          | EPI1743490            | OK563181                |
| A/Chicken/Shanghai/E780/2014   | China   | Shanghai  | Chicken | 2014-9          | EPI1743498            | OK563182                |
| A/Chicken/Shanghai/E851/2014   | China   | Shanghai  | Chicken | 2014-9          | EPI1743506            | OK563183                |
| A/Chicken/Jiangsu/E1065/2014   | China   | Jiangsu   | Chicken | 2014-9          | EPI1742930            | OK563184                |
| A/Duck/Jiangsu/E1158/2014      | China   | Jiangsu   | Duck    | 2014-9          | EPI1742938            | OK563185                |
| A/Chicken/Jiangsu/E1196/2014   | China   | Jiangsu   | Chicken | 2014-9          | EPI1742946            | OK563186                |
| A/Duck/Hunan/E1385/2014        | China   | Hunan     | Duck    | 2014-9          | EPI1742954            | OK563187                |
| A/Chicken/Hunan/E1397/2014     | China   | Hunan     | Chicken | 2014-9          | EPI1742962            | OK563229                |
| A/Chicken/Hunan/E1562/2014     | China   | Hunan     | Chicken | 2014-9          | EPI1742970            | OK563188                |
| A/Chicken/Hunan/E1621/2014     | China   | Hunan     | Chicken | 2014-9          | EPI1742978            | OK563172                |
| A/Chicken/Hunan/E1639/2014     | China   | Hunan     | Chicken | 2014-9          | EPI1742986            | OK563189                |

Continued Table S1.

| Isolate_Name                   | Country | Province  | Host    | Collection_Date | Segment_Ids<br>GISAID | Segment_Ids<br>GeneBank |
|--------------------------------|---------|-----------|---------|-----------------|-----------------------|-------------------------|
| A/Chicken/Shandong/E1719/2014  | China   | Shandong  | Chicken | 2014-9          | EPI1743514            | OK563190                |
| A/Chicken/Shandong/E1831/2014  | China   | Shandong  | Chicken | 2014-9          | EPI1743522            | OK563191                |
| A/Chicken/Shandong/E1962/2014  | China   | Shandong  | Chicken | 2014-9          | EPI1743530            | OK563192                |
| A/Chicken/Shandong/E1974/2014  | China   | Shandong  | Chicken | 2014-9          | EPI1743538            | OK563193                |
| A/Chicken/Shandong/E2006/2014  | China   | Shandong  | Chicken | 2014-9          | EPI1743546            | OK563195                |
| A/Chicken/Shandong/E2086/2014  | China   | Shandong  | Chicken | 2014-9          | EPI1743554            | OK563194                |
| A/Chicken/Anhui/E2290/2014     | China   | Anhui     | Chicken | 2014-9          | EPI1742994            | OK563170                |
| A/Chicken/Jiangxi/E2492/2014   | China   | Jiangxi   | Chicken | 2014-9          | EPI1743002            | OK563168                |
| A/Chicken/Jiangxi/E2513/2014   | China   | Jiangxi   | Chicken | 2014-9          | EPI1743010            | OK563196                |
| A/Chicken/Jiangxi/E2620/2014   | China   | Jiangxi   | Chicken | 2014-9          | EPI1743018            | OK563197                |
| A/Duck/Jiangxi/E2669/2014      | China   | Jiangxi   | Duck    | 2014-9          | EPI1743026            | OK563198                |
| A/Chicken/Jiangxi/E2764/2014   | China   | Jiangxi   | Chicken | 2014-9          | EPI1743034            | OK563199                |
| A/Duck/Jiangxi/E2783/2014      | China   | Jiangxi   | Duck    | 2014-9          | EPI1743042            | OK563200                |
| A/Duck/Jiangxi/E2838/2014      | China   | Jiangxi   | Duck    | 2014-9          | EPI1743050            | OK563201                |
| A/Chicken/Fujian/E2901/2014    | China   | Fujian    | Chicken | 2014-9          | EPI1743058            | OK563202                |
| A/Chicken/Fujian/E3005/2014    | China   | Fujian    | Chicken | 2014-9          | EPI1743066            | OK563203                |
| A/Chicken/Fujian/E3073/2014    | China   | Fujian    | Chicken | 2014-9          | EPI1743074            | OK563204                |
| A/Chicken/Fujian/E3135/2014    | China   | Fujian    | Chicken | 2014-9          | EPI1743082            | OK563205                |
| A/Chicken/Guangdong/E3555/2014 | China   | Guangdong | Chicken | 2014-9          | EPI1743562            | OK563206                |
| A/Chicken/Guangdong/E3595/2014 | China   | Guangdong | Chicken | 2014-9          | EPI1743090            | OK563207                |
| A/Chicken/Guangdong/E3653/2014 | China   | Guangdong | Chicken | 2014-9          | EPI1743098            | OK563228                |
| A/Chicken/Zhejiang/F202/2015   | China   | Zhejiang  | Chicken | 2015-7          | EPI1743106            | OK563234                |
| A/Chicken/Zhejiang/F242/2015   | China   | Zhejiang  | Chicken | 2015-7          | EPI1743114            | OK563150                |
| A/Chicken/Zhejiang/F282/2015   | China   | Zhejiang  | Chicken | 2015-7          | EPI1743122            | OK563231                |
| A/Chicken/Jiangsu/F344/2015    | China   | Jiangsu   | Chicken | 2015-7-28       | EPI1743130            | OK563233                |
| A/Chicken/Jiangsu/F345/2015    | China   | Jiangsu   | Chicken | 2015-7-28       | EPI1743138            | OK563151                |
| A/Chicken/Anhui/F598/2015      | China   | Anhui     | Chicken | 2015-8          | EPI1743146            | OK563154                |
| A/Duck/Anhui/F908/2015         | China   | Anhui     | Duck    | 2015-8          | EPI1743154            | OK563155                |
| A/Chicken/Hunan/F949/2015      | China   | Hunan     | Chicken | 2015-9-7        | EPI1743162            | OK563156                |
| A/Chicken/Hunan/F998/2015      | China   | Hunan     | Chicken | 2015-9-7        | EPI1743170            | OK563157                |
| A/Duck/Hunan/F1053/2015        | China   | Hunan     | Duck    | 2015-9-7        | EPI1743178            | OK563235                |
| A/Chicken/Fujian/F1132/2015    | China   | Fujian    | Chicken | 2015-9          | EPI1743186            | OK563158                |
| A/Duck/Fujian/F1206/2015       | China   | Fujian    | Duck    | 2015-9          | EPI1743194            | OK563159                |
| A/Chicken/Fujian/F1255/2015    | China   | Fujian    | Chicken | 2015-9          | EPI1743202            | OK563160                |
| A/Chicken/Jiangxi/F1298/2015   | China   | Jiangxi   | Chicken | 2015-9          | EPI1743210            | OK563161                |
| A/Chicken/Jiangxi/F1303/2015   | China   | Jiangxi   | Chicken | 2015-9          | EPI1743218            | OK563152                |
| A/Chicken/Jiangxi/F1370/2015   | China   | Jiangxi   | Chicken | 2015-9          | EPI1743234            | OK563230                |
| A/Chicken/Guangdong/F1650/2015 | China   | Guangdong | Chicken | 2015-9-6        | EPI1743242            | OK563153                |
| A/Chicken/Shanghai/F2170/2015  | China   | Shanghai  | Chicken | 2015-9          | EPI1743570            | OK563149                |
| A/Chicken/Shandong/F2991/2015  | China   | Shandong  | Chicken | 2015-7          | EPI1743578            | OK563163                |
| A/Duck/Shandong/F3143/2015     | China   | Shandong  | Duck    | 2015-7          | EPI1743586            | OK563164                |
| A/Chicken/Guangdong/F4012/2015 | China   | Guangdong | Chicken | 2015-9          | EPI1743258            | OK563165                |
| A/Chicken/Guangdong/F4129/2015 | China   | Guangdong | Chicken | 2015-9          | EPI1743266            | OK563166                |
| A/Chicken/Guangdong/F4198/2015 | China   | Guangdong | Chicken | 2015-9          | EPI1743274            | OK563167                |

Continued Table S1.

| Isolate_Name                   | Country | Province  | Host    | Collection_Date | Segment_Ids<br>GISAID | Segment_Ids<br>GeneBank |
|--------------------------------|---------|-----------|---------|-----------------|-----------------------|-------------------------|
| A/Chicken/Shanghai/G378/2016   | China   | Shanghai  | Chicken | 2016-11         | EPI1743594            | OK563143                |
| A/Chicken/Jiangxi/G705/2016    | China   | Jiangxi   | Chicken | 2016-11         | EPI1743282            | OK563142                |
| A/Chicken/Jiangxi/G755/2016    | China   | Jiangxi   | Chicken | 2016-11         | EPI1743290            | OK563145                |
| A/Chicken/Fujian/G1451/2016    | China   | Fujian    | Chicken | 2016-11         | EPI1743298            | OK563148                |
| A/Chicken/Guangdong/G1586/2016 | China   | Guangdong | Chicken | 2016-11         | EPI1743306            | OK563147                |
| A/Chicken/Guangdong/G1728/2016 | China   | Guangdong | Chicken | 2016-11         | EPI1743314            | OK563146                |
| A/Chicken/Guangdong/G1921/2016 | China   | Guangdong | Chicken | 2016-11         | EPI1743322            | OK563144                |
| A/Chicken/Shanghai/H96/2017    | China   | Shanghai  | Chicken | 2017-10-24      | EPI1743602            | OK563138                |
| A/Chicken/Shanghai/H97/2017    | China   | Shanghai  | Chicken | 2017-10-24      | EPI1743604            | OK563135                |
| A/Chicken/Jiangsu/H224/2017    | China   | Jiangsu   | Chicken | 2017-10-24      | EPI1743330            | OK563131                |
| A/Chicken/Jiangsu/H491/2017    | China   | Jiangsu   | Chicken | 2017-10-24      | EPI1743336            | OK563139                |
| A/Chicken/Shanghai/H514/2017   | China   | Shanghai  | Chicken | 2017-10-24      | EPI1743612            | OK563132                |
| A/Chicken/Guangdong/H938/2017  | China   | Guangdong | Chicken | 2017-10-24      | EPI1743343            | OK563140                |
| A/Chicken/Guangdong/H1027/2017 | China   | Guangdong | Chicken | 2017-10-24      | EPI1743350            | OK563141                |
| A/Chicken/Hunan/H1114/2017     | China   | Hunan     | Chicken | 2017-11-21      | EPI1743358            | OK563136                |
| A/Chicken/Jiangxi/H1258/2017   | China   | Jiangxi   | Chicken | 2017-10-31      | EPI1743366            | OK563137                |
| A/Chicken/Jiangxi/H1301/2017   | China   | Jiangxi   | Chicken | 2017-10-31      | EPI1743374            | OK563134                |
| A/Chicken/Anhui/H1517/2017     | China   | Anhui     | Chicken | 2017-10-31      | EPI1743382            | OK563133                |
| A/Chicken/Fuzhou/I25/2018      | China   | Fujian    | Chicken | 2018-09         | EPI1743384            | OK563127                |
| A/Chicken/Fuzhou/I69/2018      | China   | Fujian    | Chicken | 2018-09         | EPI1743386            | OK563125                |
| A/Chicken/Fuzhou/I73/2018      | China   | Fujian    | Chicken | 2018-09         | PI1743388             | OK563128                |
| A/Chicken/Fuzhou/I84/2018      | China   | Fujian    | Chicken | 2018-09         | PI1743390             | OK563123                |
| A/Chicken/Fuzhou/I92/2018      | China   | Fujian    | Chicken | 2018-09         | EPI1743392            | OK563129                |
| A/Chicken/Changsha/I96/2018    | China   | Hunan     | Chicken | 2018-09         | EPI1743614            | OK563130                |
| A/Chicken/Changsha/I97/2018    | China   | Hunan     | Chicken | 2018-09         | PI1743616             | OK563124                |
| A/Chicken/Changsha/I112/2018   | China   | Hunan     | Chicken | 2018-09         | EPI1743618            | OK563122                |
| A/Chicken/Nanjing/I256/2018    | China   | Jiangsu   | Chicken | 2018-09         | EPI1743394            | OK563126                |

Details about nucleotide sequences of H9N2 isolated in Southern China from 2013 to 2018 in this research.

Table S2. Selected H9N2 strains and HI titers of Cross-antigenic Assay

| Anti-serum>>>>>> |       |                                | HI titers <sup>1</sup> |      |      |      |      |      |      |      |       |       |       |      |       |       |      |       |       |      |       |      |       |       |       |      |      |       |       |       |      |      |      |      |      |      |
|------------------|-------|--------------------------------|------------------------|------|------|------|------|------|------|------|-------|-------|-------|------|-------|-------|------|-------|-------|------|-------|------|-------|-------|-------|------|------|-------|-------|-------|------|------|------|------|------|------|
| NO.              | Abbr. | Antigen                        | I256                   | I112 | I84  | I97  | I69  | I25  | H514 | H224 | H1114 | H1517 | G1728 | G705 | G1451 | G1586 | G378 | G1921 | F2170 | E552 | E2290 | D345 | D2641 | H1301 | H1258 | H97  | G755 | F1650 | D1021 | A2093 | B445 | B469 | 441  | 2106 | F98  |      |
| 1                | I256  | A/Chicken/Nanjing/I256/2018    | 2048                   | 256  | 512  | 1024 | 2048 | 256  | 4096 | 2048 | 1024  | 4096  | 256   | 1024 | 4096  | 1024  | 1024 | 512   | 256   | 512  | 256   | 512  | 1024  | 256   | 128   | 256  | 1024 | 512   | 1024  | 16    | 256  | 64   | 64   | 256  | 32   |      |
| 2                | I112  | A/Chicken/Changsha/I112/2018   | 512                    | 128  | 128  | 256  | 512  | 64   | 512  | 512  | 128   | 512   | 32    | 128  | 1024  | 256   | 128  | 64    | 64    | 128  | 128   | 128  | 1024  | 64    | 64    | 32   | 128  | 128   | 256   | 8     | 64   | 8    | 16   | 32   | 32   |      |
| 3                | I84   | A/Chicken/Fuzhou/I84/2018      | 512                    | 32   | 1024 | 128  | 512  | 128  | 512  | 256  | 64    | 1024  | 64    | 256  | 1024  | 256   | 128  | 128   | 128   | 128  | 128   | 256  | 128   | 128   | 128   | 128  | 256  | 64    | 128   | 8     | 32   | 8    | 32   | 64   | 32   |      |
| 4                | I97   | A/Chicken/Changsha/I97/2018    | 1024                   | 128  | 128  | 512  | 1024 | 64   | 1024 | 512  | 256   | 1024  | 64    | 256  | 2048  | 256   | 256  | 64    | 128   | 256  | 128   | 256  | 128   | 64    | 64    | 64   | 256  | 128   | 256   | 16    | 32   | 8    | 16   | 64   | 32   |      |
| 5                | I69   | A/Chicken/Fuzhou/I69/2018      | 256                    | 128  | 128  | 256  | 4096 | 512  | 1024 | 1024 | 64    | 512   | 512   | 256  | 2048  | 256   | 128  | 256   | 128   | 512  | 256   | 512  | 512   | 64    | 128   | 64   | 512  | 128   | 1024  | 32    | 128  | 16   | 32   | 64   | 128  |      |
| 6                | I25   | A/Chicken/Fuzhou/I25/2018      | 256                    | 128  | 256  | 128  | 4096 | 4096 | 1024 | 2048 | 64    | 512   | 512   | 1024 | 2048  | 1024  | 128  | 2048  | 256   | 1024 | 256   | 1024 | 1024  | 256   | 128   | 64   | 1024 | 128   | 1024  | 16    | 128  | 16   | 32   | 128  | 128  |      |
| 7                | H514  | A/Chicken/Shanghai/H514/2017   | 1024                   | 128  | 256  | 512  | 2048 | 256  | 2048 | 1024 | 256   | 1024  | 256   | 256  | 4096  | 512   | 256  | 256   | 128   | 512  | 512   | 256  | 1024  | 256   | 128   | 256  | 1024 | 128   | 1024  | 16    | 256  | 32   | 64   | 256  | 64   |      |
| 8                | H224  | A/Chicken/Jiangsu/H224/2017    | 128                    | 32   | 64   | 128  | 2048 | 512  | 1024 | 1024 | 64    | 512   | 256   | 256  | 2048  | 128   | 64   | 128   | 128   | 512  | 128   | 256  | 256   | 64    | 128   | 64   | 512  | 64    | 512   | 16    | 64   | 16   | 16   | 64   | 128  |      |
| 9                | H1114 | A/Chicken/Hunan/H1114/2017     | 4096                   | 512  | 512  | 2048 | 4096 | 256  | 2048 | 2048 | 2048  | 4096  | 256   | 1024 | 4096  | 1024  | 2048 | 512   | 512   | 1024 | 512   | 1024 | 2048  | 128   | 128   | 512  | 1024 | 512   | 1024  | 64    | 256  | 32   | 64   | 256  | 64   |      |
| 10               | H1517 | A/Chicken/Anhui/H1517/2017     | 2048                   | 256  | 512  | 1024 | 2048 | 256  | 2048 | 512  | 512   | 4096  | 128   | 1024 | 4096  | 1024  | 2048 | 512   | 256   | 512  | 512   | 512  | 512   | 128   | 64    | 256  | 1024 | 256   | 512   | 16    | 512  | 64   | 64   | 256  | 16   |      |
| 11               | G1728 | A/Chicken/Guangdong/G1728/2016 | 256                    | 32   | 64   | 128  | 4096 | 512  | 1024 | 1024 | 64    | 512   | 256   | 512  | 4096  | 128   | 128  | 128   | 128   | 512  | 256   | 512  | 512   | 128   | 128   | 128  | 512  | 64    | 512   | 16    | 64   | 16   | 32   | 64   | 128  |      |
| 12               | G705  | A/Chicken/Jiangxi/G705/2016    | 512                    | 64   | 128  | 256  | 2048 | 256  | 512  | 512  | 64    | 512   | 128   | 8192 | 2048  | 512   | 256  | 128   | 256   | 256  | 256   | 512  | 256   | 2048  | 64    | 128  | 128  | 512   | 256   | 256   | 4    | 64   | 8    | 32   | 128  | 32   |
| 13               | G1451 | A/Chicken/Fujian/G1451/2016    | 512                    | 64   | 128  | 512  | 4096 | 512  | 2048 | 1024 | 128   | 1024  | 128   | 512  | 8192  | 256   | 128  | 256   | 256   | 512  | 128   | 512  | 512   | 512   | 512   | 256  | 256  | 1024  | 256   | 2048  | 16   | 256  | 64   | 64   | 256  | 256  |
| 14               | G1586 | A/Chicken/Guangdong/G1586/2016 | 1024                   | 256  | 256  | 512  | 2048 | 512  | 2048 | 512  | 256   | 2048  | 128   | 1024 | 2048  | 2048  | 512  | 2048  | 256   | 512  | 256   | 1024 | 1024  | 128   | 64    | 128  | 512  | 256   | 1024  | 16    | 128  | 16   | 32   | 128  | 256  |      |
| 15               | G378  | A/Chicken/Shanghai/G378/2016   | 2048                   | 512  | 512  | 1024 | 4096 | 256  | 2048 | 1024 | 1024  | 4096  | 256   | 1024 | 4096  | 1024  | 2048 | 512   | 256   | 512  | 512   | 1024 | 1024  | 128   | 128   | 256  | 2048 | 512   | 1024  | 8     | 256  | 32   | 64   | 256  | 32   |      |
| 16               | G1921 | A/Chicken/Guangdong/G1921/2016 | 512                    | 128  | 256  | 256  | 1024 | 256  | 2048 | 256  | 128   | 1024  | 64    | 512  | 2048  | 512   | 256  | 2048  | 128   | 512  | 512   | 512  | 512   | 256   | 256   | 256  | 128  | 1024  | 128   | 1024  | 16   | 128  | 32   | 32   | 128  | 256  |
| 17               | F2170 | A/Chicken/Shanghai/F2170/2015  | 256                    | 64   | 256  | 256  | 4096 | 1024 | 1024 | 1024 | 64    | 1024  | 512   | 2048 | 4096  | 512   | 128  | 1024  | 512   | 1024 | 1024  | 1024 | 1024  | 1024  | 128   | 128  | 128  | 1024  | 256   | 2048  | 16   | 128  | 8    | 32   | 256  | 512  |
| 18               | E552  | A/Duck/Zhejiang/E552/2014      | 1024                   | 256  | 512  | 1024 | 4096 | 2048 | 2048 | 2048 | 256   | 2048  | 1024  | 2048 | 8192  | 1024  | 512  | 512   | 512   | 1024 | 1024  | 1024 | 1024  | 4096  | 256   | 256  | 512  | 2048  | 512   | 2048  | 16   | 512  | 64   | 64   | 512  | 512  |
| 19               | E2290 | A/Chicken/Anhui/E2290/2014     | 64                     | 16   | 32   | 64   | 1024 | 64   | 512  | 128  | 16    | 64    | 16    | 4096 | 1024  | 512   | 16   | 16    | 16    | 256  | 4096  | 256  | 4096  | 32    | 64    | 128  | 1024 | 256   | 2048  | 4     | 512  | 32   | 256  | 512  | 128  |      |
| 20               | D345  | A/Chicken/Zhejiang/D345/2013   | 256                    | 64   | 128  | 128  | 4096 | 1024 | 1024 | 1024 | 64    | 1024  | 256   | 1024 | 4096  | 512   | 64   | 1024  | 256   | 512  | 1024  | 1024 | 2048  | 128   | 128   | 64   | 512  | 256   | 2048  | 16    | 64   | 16   | 32   | 128  | 256  |      |
| 21               | D2641 | A/Chicken/Guangdong/D2641/2013 | 128                    | 32   | 64   | 128  | 2048 | 128  | 512  | 128  | 32    | 64    | 32    | 4096 | 1024  | 512   | 32   | 32    | 16    | 256  | 4096  | 256  | 4096  | 64    | 128   | 128  | 1024 | 256   | 2048  | 8     | 512  | 32   | 256  | 512  | 256  |      |
| 22               | H1301 | A/Chicken/Jiangxi/H1301/2017   | 128                    | 32   | 32   | 32   | 256  | 64   | 128  | 32   | 8     | 64    | 32    | 32   | 1024  | 32    | 32   | 64    | 16    | 64   | 256   | 64   | 256   | 1024  | 1024  | 512  | 2048 | 1024  | 4096  | 128   | 1024 | 256  | 512  | 1024 | 1024 |      |
| 23               | H1258 | A/Chicken/Jiangxi/H1258/2017   | 32                     | 16   | 32   | 16   | 128  | 16   | 64   | 32   | 8     | 16    | 16    | 16   | 512   | 16    | 8    | 32    | 8     | 32   | 128   | 64   | 128   | 1024  | 512   | 512  | 256  | 2048  | 512   | 2048  | 128  | 512  | 128  | 256  | 1024 | 1024 |
| 24               | H97   | A/Chicken/Shanghai/H97/2017    | 64                     | 16   | 32   | 32   | 128  | 32   | 128  | 32   | 8     | 32    | 16    | 32   | 512   | 32    | 16   | 64    | 8     | 32   | 128   | 64   | 128   | 512   | 512   | 512  | 2048 | 1024  | 4096  | 128   | 1024 | 256  | 512  | 1024 | 1024 |      |
| 25               | G755  | A/Chicken/Jiangxi/G755/2016    | 128                    | 32   | 32   | 32   | 256  | 64   | 128  | 64   | 8     | 64    | 16    | 64   | 1024  | 32    | 16   | 64    | 32    | 64   | 256   | 64   | 256   | 1024  | 1024  | 512  | 4096 | 1024  | 4096  | 64    | 1024 | 256  | 512  | 1024 | 2048 |      |
| 26               | F1650 | A/Chicken/Guangdong/F1650/2015 | 16                     | 16   | 16   | 16   | 64   | 32   | 64   | 16   | 2     | 16    | 16    | 16   | 256   | 16    | 8    | 32    | 16    | 32   | 128   | 32   | 128   | 512   | 512   | 256  | 2048 | 512   | 2048  | 64    | 512  | 128  | 256  | 512  | 1024 |      |
| 27               | D1021 | A/Chicken/Hunan/D1021/2013     | 32                     | 32   | 32   | 16   | 128  | 32   | 64   | 32   | 4     | 16    | 16    | 32   | 256   | 32    | 16   | 64    | 16    | 32   | 256   | 32   | 128   | 512   | 512   | 256  | 2048 | 512   | 4096  | 128   | 1024 | 64   | 256  | 1024 | 1024 |      |
| 28               | A2093 | A/chicken/Jiangsu/A2093/2011   | 32                     | 128  | 64   | 32   | 128  | 32   | 256  | 64   | 2     | 128   | 16    | 128  | 256   | 32    | 64   | 128   | 128   | 64   | 512   | 64   | 256   | 512   | 256   | 128  | 4096 | 512   | 4096  | 256   | 256  | 64   | 512  | 1024 | 2048 |      |
| 29               | B445  | A/chicken/Hunan/B445/2011#     | 128                    | 32   | 32   | 32   | 512  | 64   | 256  | 64   | 8     | 128   | 16    | 64   | 2048  | 64    | 32   | 128   | 8     | 64   | 512   | 256  | 256   | 2048  | 1024  | 1024 | 1024 | 4096  | 2048  | 8192  | 512  | 2048 | 1024 | 2048 | 4096 | 4096 |
| 30               | B469  | A/chicken/Shanghai/B469/2011#  | 64                     | 64   | 32   | 256  | 64   | 256  | 64   | 8    | 128   | 16    | 64    | 2048 | 64    | 32    | 64   | 16    | 128   | 256  | 256   | 128  | 2048  | 1024  | 1024  | 2048 | 1024 | 8192  | 128   | 1024  | 1024 | 1024 | 1024 | 2048 | 2048 |      |
| 31               | 441   | A/Chicken/Shanghai/441/2009#   | 64                     | 64   | 64   | 32   | 256  | 64   | 256  | 32   | 4     | 128   | 8     | 32   | 2048  | 64    | 32   | 128   | 16    | 128  | 512   | 256  | 256   | 4096  | 1024  | 1024 | 4096 | 2048  | 8192  | 256   | 4096 | 1024 | 2048 | 4096 | 2048 |      |
| 32               | 2106  | A/chicken/Hunan/2106/2009#     | 128                    | 64   | 128  | 64   | 512  | 128  | 256  | 64   | 8     | 128   | 16    | 128  | 2048  | 64    | 64   | 128   | 32    | 128  | 512   | 256  | 256   | 2048  | 1024  | 1024 | 4096 | 2048  | 8192  | 512   | 4096 | 1024 | 2048 | 4096 | 2048 |      |
| 33               | F98   | A/Chicken/Shanghai/F/1998      | 8                      | 4    | 4    | 4    | 8    | 8    | 8    | 8    | 1     | 8     | 1     | 8    | 64    | 8     | 8    | 8     | 8     | 8    | 64    | 8    | 16    | 64    | 256   | 32   | 256  | 64    | 1024  | 16    | 256  | 16   | 64   | 256  | 1024 |      |

NOTE: The bold line grouped the virus strains basing on the time-scaled tree. 1 The background color depth were based on the value of HI titers, red was the high HI titer, indicating close antigenicity; light yellow was low HI titers indicating big distance in activity.

TableS3.The antigenic distances

| Strains | I256     | I112     | I84      | I97      | I69      | I25      | H514     | H224     | H1114    | H1517    | G1728    | G705     | G1451    | G1586    | G378     | G1921    | F2170    | E552     | E2290    | D345     | D2641    | H1301    | H1258    | H97      | G755     | F1650    | D1021    | A2093    | B445     | B469     | 441      | 2106     | F98*     |          |
|---------|----------|----------|----------|----------|----------|----------|----------|----------|----------|----------|----------|----------|----------|----------|----------|----------|----------|----------|----------|----------|----------|----------|----------|----------|----------|----------|----------|----------|----------|----------|----------|----------|----------|----------|
| I256    | 0        | 2.562672 | 5.131206 | 1.393596 | 5.919718 | 7.881337 | 4.472925 | 5.312156 | 1.542524 | 2.405899 | 6.922    | 7.703483 | 5.996075 | 5.053535 | 2.421182 | 7.17391  | 4.832598 | 5.435165 | 8.265712 | 5.432955 | 7.0213   | 9.075241 | 9.345873 | 8.231075 | 8.850569 | 8.757525 | 9.324753 | 8.865774 | 8.942386 | 8.965403 | 9.080415 | 9.050292 | 9.368326 |          |
| I112    | 2.562672 | 0        | 5.314532 | 2.552292 | 5.568363 | 7.328958 | 4.245524 | 5.137418 | 2.760476 | 2.40868  | 6.300339 | 7.835448 | 5.980995 | 4.364124 | 2.586355 | 6.50359  | 4.755528 | 5.244807 | 8.285411 | 4.650438 | 6.963964 | 9.81761  | 9.320452 | 8.317152 | 8.393333 | 8.658722 | 9.171505 | 8.708638 | 8.895732 | 9.01596  | 8.976053 | 8.935262 | 9.268199 |          |
| I84     | 5.131206 | 5.314532 | 0        | 5.197315 | 6.452434 | 7.083417 | 5.436593 | 6.006364 | 5.729935 | 4.52018  | 6.324828 | 7.815711 | 6.325019 | 5.636071 | 5.234084 | 6.834875 | 5.307711 | 5.921823 | 8.323905 | 5.70759  | 7.242346 | 9.107316 | 9.41676  | 6.609893 | 9.028128 | 9.063067 | 9.439288 | 9.021588 | 9.026057 | 9.019331 | 9.142646 | 9.123295 | 9.468001 |          |
| I97     | 1.393596 | 2.552292 | 5.197315 | 0        | 5.347661 | 7.502283 | 3.955802 | 4.671734 | 2.214893 | 2.450482 | 6.089312 | 7.544501 | 5.1145   | 4.886915 | 2.850419 | 7.15584  | 4.125076 | 4.806733 | 8.106401 | 5.016207 | 6.499323 | 9.158624 | 9.441496 | 8.252934 | 8.855918 | 8.846322 | 9.35582  | 8.989928 | 9.011616 | 9.065073 | 9.195414 | 9.133231 | 9.444972 |          |
| I69     | 5.919718 | 5.568363 | 6.452434 | 5.347661 | 0        | 5.159209 | 4.32314  | 2.849926 | 6.021592 | 5.368188 | 3.90788  | 6.853161 | 3.923171 | 5.337656 | 6.095561 | 6.083674 | 3.696435 | 2.840586 | 7.56688  | 3.089213 | 5.932548 | 9.607399 | 9.968952 | 9.276676 | 9.527074 | 9.566021 | 9.688081 | 9.523878 | 9.570713 | 9.537896 | 9.656944 | 9.646147 | 9.897036 |          |
| I25     | 7.881337 | 7.328958 | 7.083417 | 7.502283 | 5.159209 | 0        | 6.650762 | 4.23779  | 7.998637 | 7.492371 | 4.292045 | 7.550081 | 6.339336 | 6.012235 | 7.946663 | 5.026936 | 5.636023 | 4.406349 | 8.072407 | 4.909443 | 6.773855 | 8.783775 | 9.003262 | 8.782658 | 8.684565 | 8.903125 | 8.852719 | 8.854365 | 8.839197 | 8.828113 | 8.92728  | 8.886583 | 8.952108 |          |
| H514    | 4.472925 | 4.245524 | 5.436593 | 3.955802 | 4.32314  | 6.650762 | 0        | 4.43699  | 5.231507 | 3.651252 | 5.467397 | 7.628805 | 3.936131 | 4.032269 | 4.789201 | 5.349559 | 4.261779 | 3.897711 | 8.042498 | 4.115855 | 6.681048 | 9.536957 | 9.977535 | 9.078128 | 9.438988 | 9.575686 | 9.815564 | 9.526972 | 9.526636 | 9.482756 | 9.660624 | 9.637542 | 9.961707 |          |
| H224    | 5.312156 | 5.137418 | 6.006364 | 4.671734 | 2.849926 | 4.23779  | 4.43699  | 0        | 5.435653 | 5.323103 | 3.235209 | 7.442363 | 4.344656 | 5.315735 | 6.03424  | 6.063722 | 3.391681 | 2.273741 | 8.236392 | 3.615341 | 6.223734 | 9.509087 | 9.835807 | 9.041062 | 9.392615 | 9.487473 | 9.693737 | 9.422799 | 9.516732 | 9.481874 | 9.639348 | 9.596759 | 9.79809  |          |
| H1114   | 1.542524 | 2.760476 | 5.729935 | 2.214893 | 6.021592 | 7.998637 | 5.231507 | 5.435653 | 0        | 3.309781 | 7.147486 | 7.873318 | 6.446914 | 5.673663 | 2.986068 | 7.420173 | 5.218179 | 5.674899 | 8.1677   | 5.603454 | 7.131749 | 8.869211 | 9.079233 | 8.031519 | 8.572084 | 8.504412 | 9.035475 | 8.64102  | 8.755705 | 8.783591 | 8.865764 | 8.835121 | 9.106218 |          |
| H1517   | 2.405899 | 2.40868  | 4.52018  | 2.450482 | 5.368188 | 7.492371 | 3.651252 | 5.323103 | 3.309781 | 0        | 6.39834  | 7.71423  | 5.365906 | 4.281339 | 1.649573 | 6.558804 | 4.412411 | 5.098631 | 8.273432 | 4.588504 | 6.963768 | 9.234261 | 9.578149 | 8.530828 | 8.92418  | 8.97151  | 9.479434 | 9.114321 | 9.101721 | 9.124286 | 9.27609  | 9.233395 | 9.538811 |          |
| G1728   | 6.922    | 6.300339 | 6.324828 | 6.089312 | 3.90788  | 4.292045 | 5.467397 | 3.235209 | 7.147486 | 6.39834  | 0        | 7.342109 | 4.651798 | 5.927761 | 7.115933 | 6.427404 | 4.015395 | 3.367898 | 7.98302  | 4.351723 | 5.875337 | 9.198454 | 9.377264 | 7.49625  | 8.889199 | 9.123379 | 9.208668 | 9.179682 | 9.138553 | 9.173451 | 9.313846 | 9.21874  | 9.288716 |          |
| G705    | 7.703483 | 7.835448 | 7.815711 | 7.544501 | 6.853161 | 7.500081 | 6.28805  | 7.442363 | 7.873318 | 7.71423  | 7.342109 | 0        | 7.524424 | 6.652424 | 7.692876 | 7.854345 | 6.721169 | 7.121311 | 5.31053  | 7.255276 | 4.414254 | 9.135365 | 9.308626 | 9.965614 | 9.030384 | 8.950766 | 9.070756 | 9.075508 | 8.897514 | 8.995736 | 8.900234 | 8.923358 | 9.208634 |          |
| G1451   | 5.996075 | 5.980995 | 6.325019 | 5.1145   | 3.923171 | 6.339336 | 3.936131 | 4.344656 | 6.446914 | 5.365906 | 4.651798 | 7.524424 | 0        | 6.118257 | 6.24482  | 7.061541 | 4.193409 | 4.352785 | 8.064987 | 4.661316 | 6.388082 | 8.571855 | 9.74952  | 7.986393 | 8.62412  | 8.62866  | 8.751944 | 8.806602 | 8.652698 | 8.500465 | 8.762905 | 8.681916 | 9.121537 |          |
| G1586   | 5.053535 | 4.364124 | 5.636071 | 4.886915 | 5.337656 | 6.012235 | 4.032269 | 5.315735 | 5.673663 | 4.281339 | 5.927761 | 6.652424 | 6.118257 | 0        | 5.105069 | 4.381258 | 4.675081 | 4.633572 | 7.332592 | 3.696977 | 5.802246 | 4.441115 | 9.850815 | 9.037984 | 9.292782 | 9.285489 | 9.576583 | 9.381043 | 9.30172  | 9.34351  | 9.429806 | 9.411379 | 9.691357 |          |
| G378    | 2.421182 | 2.586355 | 5.234084 | 2.850419 | 6.099561 | 7.946663 | 4.789201 | 6.03424  | 2.986068 | 1.649573 | 7.115933 | 7.692876 | 6.24482  | 5.105069 | 0        | 7.22907  | 5.390295 | 5.936294 | 8.194701 | 5.574939 | 7.242847 | 8.926354 | 9.192691 | 8.177693 | 8.4896   | 8.56844  | 9.137526 | 8.755638 | 8.732102 | 8.800014 | 9.07771  | 8.868982 | 9.182034 |          |
| G1921   | 7.17391  | 6.50359  | 6.834875 | 7.15584  | 6.083674 | 5.026936 | 5.349559 | 6.063722 | 7.420173 | 6.558804 | 6.427404 | 7.854345 | 7.061541 | 4.381258 | 7.22907  | 0        | 5.800921 | 5.030164 | 8.254384 | 4.374949 | 7.534138 | 8.901738 | 9.183836 | 9.016387 | 8.938791 | 9.028341 | 9.033042 | 8.908635 | 9.010741 | 8.940295 | 9.038803 | 9.042307 | 9.081208 |          |
| F2170   | 4.832598 | 4.755528 | 5.307711 | 4.125076 | 3.696435 | 5.636023 | 4.261779 | 3.391681 | 5.218179 | 4.412411 | 4.015395 | 6.721169 | 4.193409 | 4.675081 | 5.390295 | 5.800921 | 0        | 2.681953 | 8.124291 | 3.151879 | 5.876411 | 9.501548 | 8.813192 | 8.953026 | 9.149506 | 9.341167 | 9.568465 | 9.31513  | 9.48394  | 9.48367  | 9.59839  | 9.524769 | 9.623681 |          |
| E552    | 5.435165 | 5.244807 | 5.921823 | 4.806733 | 2.840586 | 4.406349 | 3.897711 | 2.273741 | 5.674899 | 5.098631 | 3.367898 | 7.121311 | 4.352785 | 4.633572 | 5.936294 | 5.030164 | 2.681953 | 0        | 7.668952 | 2.738034 | 5.790345 | 9.465177 | 9.862179 | 9.041633 | 9.371167 | 9.479878 | 9.599457 | 9.453132 | 9.4348   | 9.420637 | 9.578361 | 9.535566 | 9.803974 |          |
| E290    | 8.265712 | 8.285411 | 8.323905 | 8.106401 | 7.56688  | 8.072407 | 8.042498 | 8.236392 | 8.1677   | 8.273432 | 7.98302  | 5.31053  | 8.064987 | 7.332592 | 8.194701 | 8.254384 | 8.124291 | 7.668952 | 0        | 7.720218 | 3.504082 | 8.595847 | 8.798185 | 8.487513 | 8.258641 | 8.402916 | 8.148384 | 8.475178 | 8.200649 | 8.421267 | 8.117975 | 8.165836 | 8.587564 |          |
| D345    | 5.432955 | 4.650438 | 5.70759  | 5.016207 | 3.089213 | 4.909443 | 4.115855 | 3.615341 | 5.603454 | 4.588504 | 4.351723 | 7.255276 | 4.661316 | 3.696977 | 5.574939 | 4.374949 | 3.151879 | 2.738034 | 7.720218 | 0        | 5.990248 | 9.138928 | 9.590372 | 8.758736 | 9.078244 | 9.05803  | 9.226193 | 9.096303 | 9.158444 | 9.012624 | 9.1867   | 9.152861 | 9.520056 |          |
| D2641   | 7.0213   | 6.963964 | 7.242346 | 6.493923 | 5.932548 | 6.773855 | 6.681048 | 6.223734 | 7.131749 | 6.963768 | 5.875337 | 4.414254 | 6.388082 | 5.802246 | 7.242847 | 7.534138 | 5.876411 | 5.790435 | 3.504082 | 5.990248 | 0        | 9.278386 | 9.49734  | 8.811321 | 8.887164 | 8.991307 | 8.990632 | 9.191973 | 8.937074 | 9.128872 | 9.006251 | 8.976326 | 9.333152 |          |
| H1301   | 9.075241 | 9.81761  | 9.107316 | 9.158624 | 9.607399 | 9.783775 | 9.536957 | 9.509087 | 8.869211 | 9.234261 | 9.198454 | 9.135365 | 8.571855 | 9.441115 | 8.926354 | 8.901738 | 9.501548 | 9.465177 | 8.595847 | 9.138928 | 9.278386 | 0        | 3.3751   | 2.875827 | 4.180321 | 2.680892 | 2.69897  | 4.511973 | 2.500152 | 2.407345 | 2.446949 | 2.394141 | 3.943625 |          |
| H1258   | 9.345873 | 9.320452 | 9.41676  | 9.441496 | 9.441496 | 9.689952 | 9.003262 | 9.977535 | 9.835807 | 9.079233 | 9.578149 | 9.377264 | 9.308626 | 8.974952 | 9.850815 | 9.192691 | 9.183836 | 8.813192 | 9.862179 | 9.798185 | 9.590372 | 9.49734  | 3.3751   | 0        | 3.408366 | 3.632254 | 3.343648 | 3.095849 | 4.227214 | 4.11268  | 3.18072  | 3.446859 | 3.386343 | 4.012515 |
| H97     | 8.231075 | 8.317152 | 8.609893 | 8.252934 | 9.276676 | 8.782658 | 9.078128 | 9.041062 | 8.031519 | 8.530828 | 8.749625 | 8.965614 | 7.986393 | 9.037984 | 8.177693 | 9.016387 | 8.953026 | 9.041633 | 8.487513 | 8.758736 | 8.811321 | 2.875827 | 3.408366 | 0        | 4.276551 | 2.02648  | 2.386822 | 4.408336 | 2.600765 | 2.286919 | 2.820729 | 2.768005 | 3.624888 |          |
| G755    | 8.850569 | 8.393333 | 9.028128 | 8.855918 | 9.527074 | 8.684565 | 9.438988 | 9.392615 | 8.572084 | 8.92418  | 8.889199 | 9.030384 | 8.62412  | 9.292782 | 8.4896   | 8.938791 | 9.149506 | 9.371167 | 8.258641 | 9.078244 | 8.887164 | 4.180321 | 3.632254 | 4.276551 | 0        | 3.600799 | 3.676147 | 3.631975 | 4.613508 | 4.360013 | 3.665238 | 3.536102 | 3.992078 |          |
| F1650   | 8.757525 | 8.658722 | 9.063067 | 8.846322 | 9.566021 | 8.903125 | 9.575686 | 9.487473 | 8.504412 | 8.97151  | 9.123379 | 9.950766 | 6.62866  | 9.285489 | 8.56844  | 9.028341 | 9.341167 | 9.479878 | 8.402916 | 9.05803  |          |          |          |          |          |          |          |          |          |          |          |          |          |          |
